# Supplementary material for: A simple, high-throughput method of protein and label removal from extracellular vesicle samples
Source: Royal Society of Chemistry journal article supplement (doi:10.1039/d0nr07830a), 2021-01-01
Supplement: d0nr07830a2.xlsx [file d0nr07830a2.xlsx]

## Sheet: MIFlowCytEV
Framework Criteria	What to report	Please complete each criterion
1.1 Preanalytical variables conforming to MISEV guidelines.	Preanalytical variables relating to EV sample including source, collection, isolation, storage, and any others relevant and available in the performed study.	DC2.4 Cell culture EV sample, purified using ultrafiltration followed by qEV-10.
1.2 Experimental design according to MIFlowCyt guidelines.	EV-FC manuscripts should provide a brief description of the experimental aim, keywords, and variables for the performed FC experiment(s) using MIFlowCyt checklist criteria: 1.1, 1.2, and 1.3, respectively. Template found at www.evflowcytometry.org.	Detectable EV recovery before and after EV-clean incubation was measured using flow cytometry
2.1 Sample staining details	State any steps relating to the staining of samples. Along with the method used for staining, provide relevant reagent descriptions as listed in MIFlowCyt guidelines (Section 2.4 Fluorescence Reagent(s) Descriptions).	Not applicable
2.2 Sample washing details	State any steps relating to the washing of samples.	Not applicable
2.3 Sample dilution details	All methods and steps relating to sample dilution.	Samples were incubated with EV-clean resin at 1e8/mL based on NTA measurement. Samples were diluted 10-folder for analysis using flow cytometry
3.1 Buffer alone controls.	State whether a buffer-only control was analyzed at the same settings and during the same experiment as the samples of interest. If utilized it is recommended that all samples be recorded for a consistent set period of time e.g. 5 minutes, rather than stopping analysis at a set recorded event count e.g. 100,000 events. This allows comparisons of total particle counts between controls and samples.	DPBS control was included
3.2 Buffer with reagent controls.	State whether a buffer with reagent control was analyzed at the same settings, same concentrations, and during the same experiment as the samples of interest. If used state what the results were.	Not applicable
3.3 Unstained controls.	State whether unstained control samples were analyzed at the same settings and during the same experiment as stained samples. If used, state what the results were, preferably in standard units.	All samples were unstained
3.4 Isotype controls.	The use of isotype controls is applicable to immunofluorescence labelling only. State whether isotype controls were analyzed at the same settings and during the same experiment as stained samples. If utilized, state which antibody they are matched to, the concentration used, and what the results were (Section 4.2, 4.3, 4.4). Due to conjugation differences between manufacturers if should be stated…	Not applicable
3.5 Single-stained controls.	State whether single-stained controls were included. If used state whether the single-stained controls were recorded using the same settings, dilutions, and during the same experiment as stained samples and state what the results were, preferably in standard units (Section 4.2, 4.3, 4.4).	Not applicable
3.6 Procedural controls.	State whether procedural controls were included. If used, state the procedure and if the procedural controls were acquired at the same settings and during the same experiment as stained samples.	Samples recorded were before and after procedure
3.7 Serial dilutions.	State whether serial dilutions were performed on samples and note the dilution range and manner of testing. The fluorescence and/or scatter signal intensity would ideally be reported in standard units (see Section 4.3, 4.4) but arbitrary units can also be used. This data is best reported by plotting the recorded number events/concentration over a set period of time at different sample dilution. T…	Samples are from cell culture, purified, and concentration adjusted using NTA. These sample were run at a concentration that has previously been shown to produce single EV detection. Dilution as a result of EV-Clean incubation shown not signal change with a drop in concentration in accordance with single-EV detection
3.8. Detergent treated EV-samples	State whether samples were detergent treated to assess lability. If utilized, state what detergent was used, the end concentration of the detergent, and what the results were of the lysis.	Not required due to EVs having been derived from a source that would contain contaiminates such as lipoproteins and having been purified from free protein using qEV.
4.1 Trigger Channel(s) and Threshold(s).	The trigger channel(s) and threshold(s) used for event detection. Preferably, the fluorescence calibration (Section 4.3) and/or scatter calibration (Section 4.4) should be used in order to report the trigger channel(s) and threshold(s) in standardized units.	Trigger Channel(s) and Threshold(s) in calibrated and arbitrary units are summarized for each sample in the table on the 'Sample Acq Sheet'.
4.2 Flow Rate / Volumetric quantification.	State if the flow rate was quantified/validated and if so, report the result and how they were obtained.	Samples were run at the lowest flow rate setting. Acquisition volume was measured using the internal flow rate sensor of the cytometer.
4.3 Fluorescence Calibration.	State whether fluorescence calibration was implemented, and if so, report the materials and methods used, catalogue numbers, lot numbers, and supplied reference units for the standards. Fluorescence parameters may be reported in standardized units of MESF, ERF, or ABC beads. The type of regression used, and the resulting scatter plot of arbitrary data vs standard data for the reference particles …	Fluorescence calibration was not performed due to no fluorescence parameters being used.
4.4 Light Scatter Calibration.	State whether and how light scatter calibration was implemented. Light scatter parameters may be reported in standardized units of nm2, along with information required to reproduce the model.	Light scatter calibration was performed using FCMPASS software as previously demonstrated [1,2]. Details on the reagents and modelling parameters can be found in the summary table on the 'SSC Cali' sheet and in FCMPASS supplementary figure 1.
5.1 EV diameter/surface area/volume approximation.	State whether and how EV diameter, surface area, and/or volume has been calculated using FC measurements.	Diameter approximation using light scattering was performed using FCMPASS software as previously demonstrated [1,2]. Details of modelling parameters for calibration, core-shell, and solid sphere models can be found in the 'SSC Cali' sheet and in FCMPASS supplementary figure 1.
5.2 EV refractive index approximation.	State whether the EV refractive index has been approximated and how this was done.	Not applicable
5.3 EV epitope number approximation.	State whether EV epitope number has been approximated, and if so, how it was approximated.	Not applicable
6.1 Completion of MIFlowCyt checklist.	Complete MIFlowCyt checklist criteria 1 to 4 using the MIFlowCyt guidelines. Template found at www.evflowcytometry.org.	Complete
6.2 Calibrated channel detection range	If fluorescence or scatter calibration has been carried out, authors should state whether the upper and lower limits of a calibrated detection channel were calculated in standardized units. This can be done by converting the arbitrary unit scale to a calibrated scaled, as discussed in Section 4.3 and 4.4, and providing the highest unit on this scale and the lowest detectable unit above the unstai…	LoD can be found in Sample Acq Info sheet
6.3 EV number/concentration.	State whether EV number/concentration has been reported. If calculated, it is preferable to report EV number/concentration in a standardized manner, stating the number/concentration between a set detection range.	Concentration of particles between 115-200 nm using light scatter modelling to derive EV diameter.
6.4 EV brightness.	When applicable, state the method by which the brightness of EVs is reported in standardized units of scatter and/or fluorescence.	Not Applicable
7.1. Sharing of data to a public repository.	Provide a link to the experimental data in a public data repository.	Files available from: https://jones-lab-nanopass.s3.amazonaws.com/Paper+Data/2020/EV-Clean, 2020/Archive.zip
References
Welsh, J.A., Horak, P., Wilkinson, J.S., Ford, V.J., Jones, J.C., Smith, D., Holloway, J.A. and Englyst, N.A. (2019), FCMPASS Software Aids Extracellular Vesicle Light Scatter Standardization. Cytometry. doi:10.1002/cyto.a.23782
Welsh, J.A., Jones, J.C. and Tang, V.A. (2020), Fluorescence and Light Scatter Calibration Allow Comparisons of Small Particle Data in Standard Units across Different Flow Cytometry Platforms and Detector Settings. Cytometry. doi:10.1002/cyto.a.24029

## Sheet: Sample Acq Info
The following extrapolations of thresholds to standard units assume that samples were acquired at the same detector settings as their calibration controls.
If applied, calibration metadata for fluorescence and light scattering calibration can be found in the 'Fl Cali' and 'SSC Cali' sheets, respectively.
Filename	Sample Type	Trigger Parameter	Trigger ID	Trigger Threshold (au)	Detector Setting (au)	Trigger Threshold | Polystyrene (nm)	Trigger Threshold | EV Diameter (nm)	Trigger Threshold | Scattering CS (nm^2)
EVs+EVC.fcs	Sample	SSC-H	SSC	500	1000	60.4	100	394.7
EVs.fcs	Sample	SSC-H	SSC	500	1000	60.4	100	394.7
EVs+EVCx2.fcs	Sample	SSC-H	SSC	500	1000	60.4	100	394.7
DPBS.fcs	Sample	SSC-H	SSC	500	1000	60.4	100	394.7

## Sheet: SSC Cali
FCMPASS software version	3.03
Flow Cytometer Modelling Settings
SSC Parameter	Wavelength	Sheath RI	Determine HA	Aperture Geom	Theta	Phi	Eps	Cali. Factor (nm^2)
SSC-H | SSC-H	405	1.34309	off	circle	90	90	67.4	0.789499
Light scatter calibration reference beads
Diameter (nm)	Diameter CV (%)	Measured RI	Measurement Wavelength	Composition	Acquired Stat	Acquired CV	Acquisition Wavelength	Modelled RI	Manufacturer	Catalogue No.	Lot No.
81	11.7	1.59	589	Polystyrene	2678	NA	405	1.62527	ThermoFisher Scientific	3080A
Core-Shell Modelling Settings
Shell RI	Core RI	Shell Thickness (nm)	Parameter Name
1.47372	1.39406	5	EV Diameter (nm) [High RI]
References
Welsh, J.A., Horak, P., Wilkinson, J.S., Ford, V.J., Jones, J.C., Smith, D., Holloway, J.A. and Englyst, N.A. (2019), FCMPASS Software Aids Extracellular Vesicle Light Scatter Standardization. Cytometry. doi:10.1002/cyto.a.23782
Welsh, J.A., Jones, J.C. and Tang, V.A. (2020), Fluorescence and Light Scatter Calibration Allow Comparisons of Small Particle Data in Standard Units across Different Flow Cytometry Platforms and Detector Settings. Cytometry. doi:10.1002/cyto.a.24029
